# Supplementary figures and images for: A versatile optical assay plate fabricated from e-waste and its application towards rapid determination of Fe3+ ions in water
Source: Royal Society of Chemistry journal article supplement (doi:10.1039/c7nj01627a), 2017-01-01

SUPPLEMENTARY INFORMATION (SI)

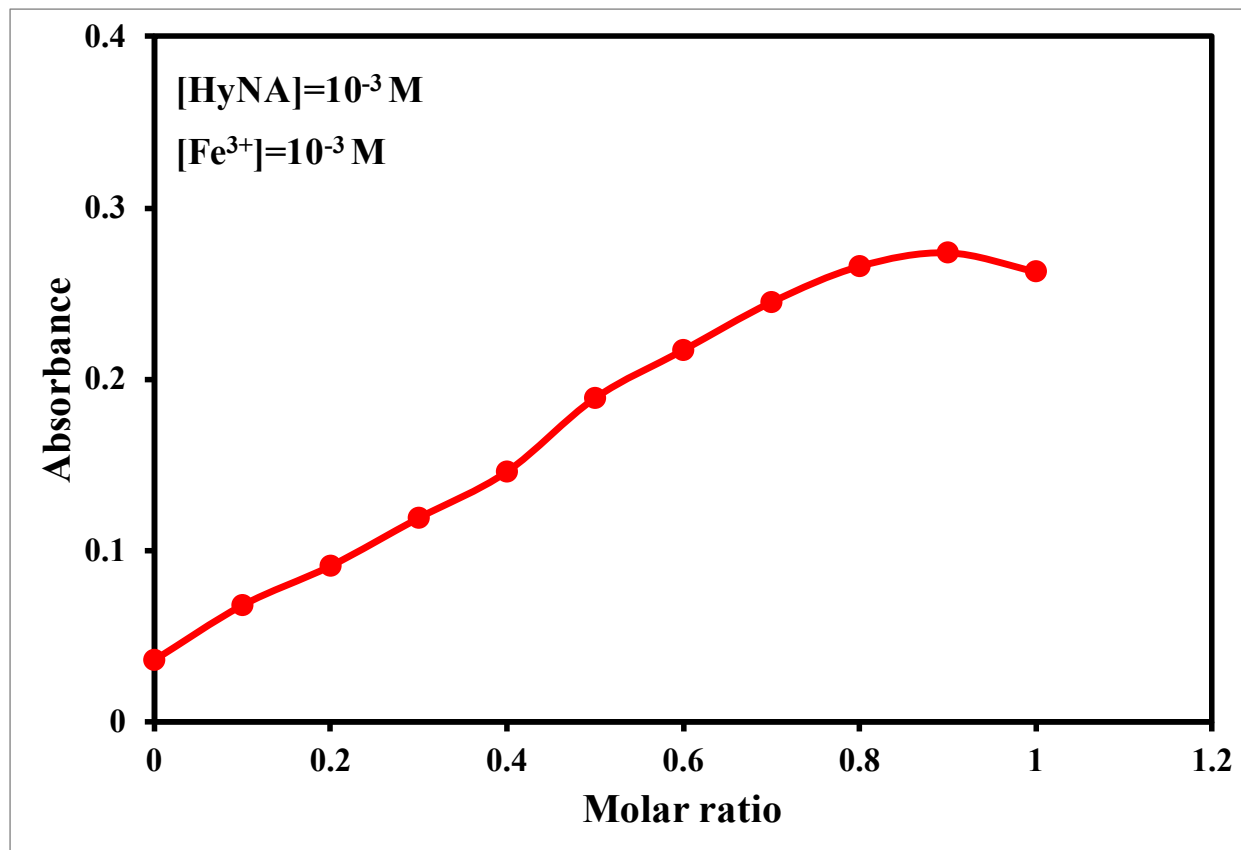

S-1: Molar ratio between Fe<sup>3+</sup> and HyNA reagent.

Supplement: c7nj01627a1.pdf [file c7nj01627a1.pdf]
